# Supplementary material for: Ruthenium(II)/(III) complexes of 4-hydroxy-pyridine-2,6-dicarboxylic acid with PPh3/AsPh3 as co-ligand: Impact of oxidation state and co-ligands on anticancer activity in vitro
Source: Royal Society of Chemistry journal article supplement (doi:10.1039/c1dt11273b), 2011-12-20
Supplement: c1dt11273b.pdf [file c1dt11273b.pdf]

# SUPPORTING INFORMATION FILE

**Ruthenium (II)/(III) complexes of 4-hydroxy-pyridine-2, 6-dicarboxylic acid with PPh<sub>3</sub>/AsPh<sub>3</sub> as co-ligand: Impact of oxidation state and co-ligands on anticancer activity in vitro**

**Thangavel Sathiya Kamatchi,<sup>a</sup> Nataraj Chitrapriya,<sup>b</sup> Hyosun Lee,<sup>\*b</sup> Chris F. Fronczek,<sup>c</sup> Frank R. Fronczek,<sup>c</sup> Karuppannan Natarajan.<sup>\*a</sup>**

<sup>a</sup> *Department of Chemistry, Bharathiar University, Coimbatore 641046, India.*

*E-mail: k\_natraj6@yahoo.com; Tel.: +91 422 2428319; Fax: +91 422 2422387.*

<sup>b</sup> *Department of Chemistry and Green-Nano Materials Research Center, Kyungpook National University, 1370 Sankyuk-dong, Buk-gu, Deagu, 702-701, Republic of Korea. E-mail: hyosunlee@knu.ac.kr; Tel.: 82-53-950-5337; Fax: 82-53-950-6330.*

<sup>c</sup> *Department of Chemistry, Louisiana State University, Baton Rouge, LA 70803, USA.*

## Table of Contents

1. Characterization of the complex by  $^1\text{H}$  NMR spectroscopy
2. Cyclic voltammetry
3. Single crystal X-Ray diffraction analysis data
4. DNA Binding studies
5. Antioxidant activity
6. *in vitro* anticancer studies

### 1. Characterization of the complex [Ru<sup>II</sup>-hpa-P] by <sup>1</sup>H NMR spectroscopy

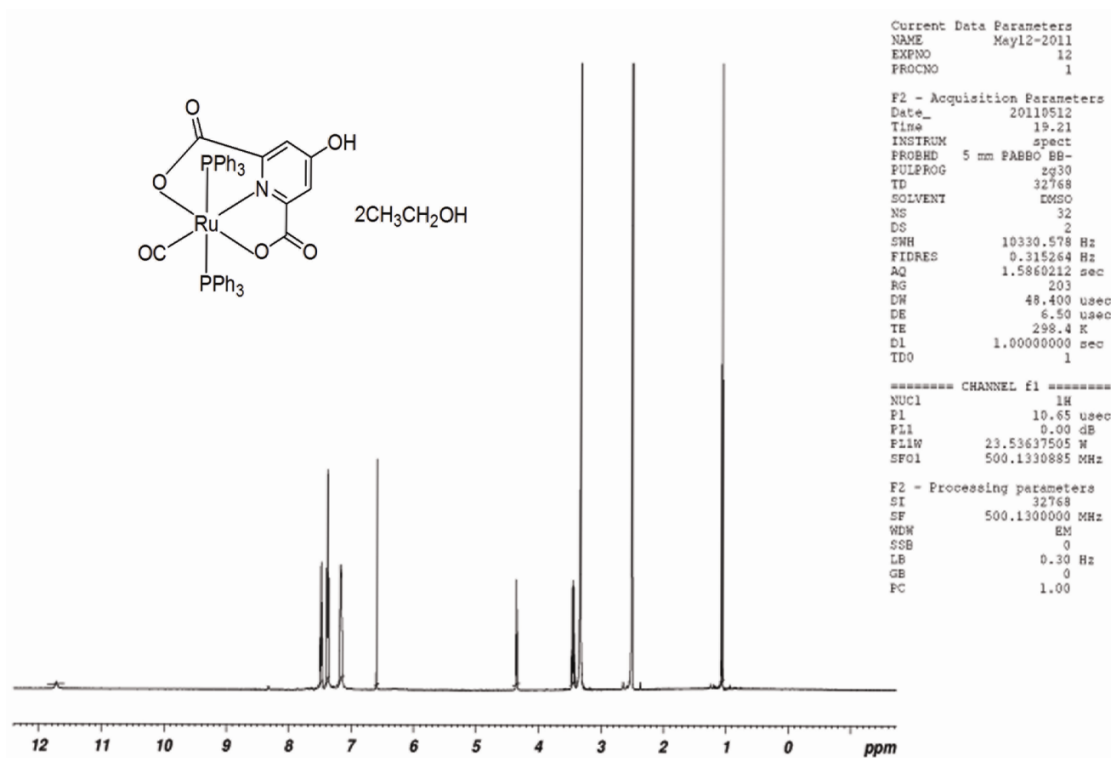

Fig. S1 <sup>1</sup>H NMR Spectrum of the complex [Ru<sup>II</sup>-hpa-P]

## 2. Cyclic Voltammetry

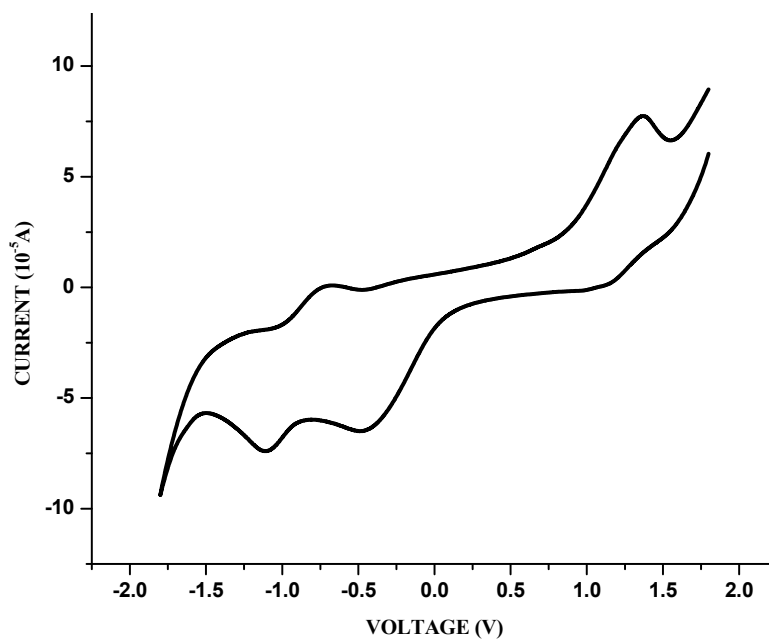

**Fig. S2** Cyclic voltammetric response of [Ru<sup>II</sup>-Hpa-P]

### 3. X-ray crystallography

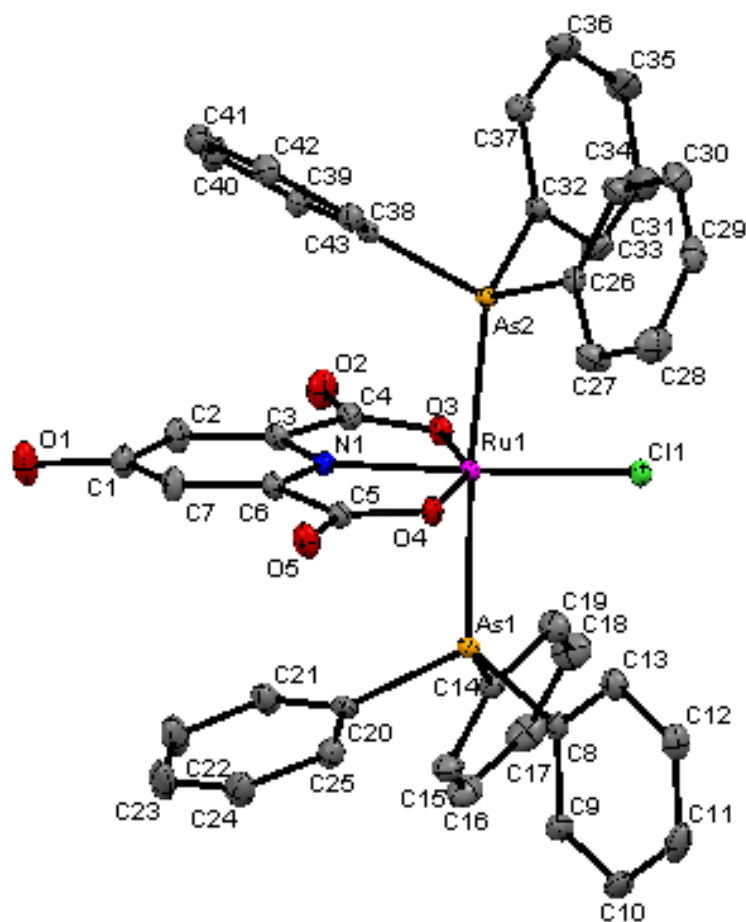

**Fig. S3** X-ray crystal structure and atom numbering scheme for  $[\text{Ru}^{\text{III}}\text{-hpa-As}]$  as thermal ellipsoids at 50% probability level. The hydrogen atoms have been omitted for clarity.

**Table S1** Hydrogen-bonding distances (Å) and angles (°)

| Complex                                  | D-H...A    | D-H      | H...A    | D...A    | D-H...A  |
|------------------------------------------|------------|----------|----------|----------|----------|
|                                          | O8-H8...O5 | 0.840(3) | 1.902(1) | 2.733(3) | 170.0(2) |
| $[\text{Ru}^{\text{II}}\text{-hpa-P}]$   | O1-H1...O7 | 0.840(1) | 1.728(1) | 2.558(2) | 169.3(1) |
|                                          | O7-H7A-O2  | 0.840(1) | 1.834(1) | 2.644(2) | 161.3(1) |
| $[\text{Ru}^{\text{III}}\text{-hpa-P}]$  | O1-H1...O5 | 0.820(2) | 1.932(2) | 2.735(3) | 166.3(2) |
| $[\text{Ru}^{\text{III}}\text{-hpa-As}]$ | O1-H1...O5 | 0.841(2) | 1.926(2) | 2.729(2) | 159.6(1) |

#### 4. DNA Binding studies

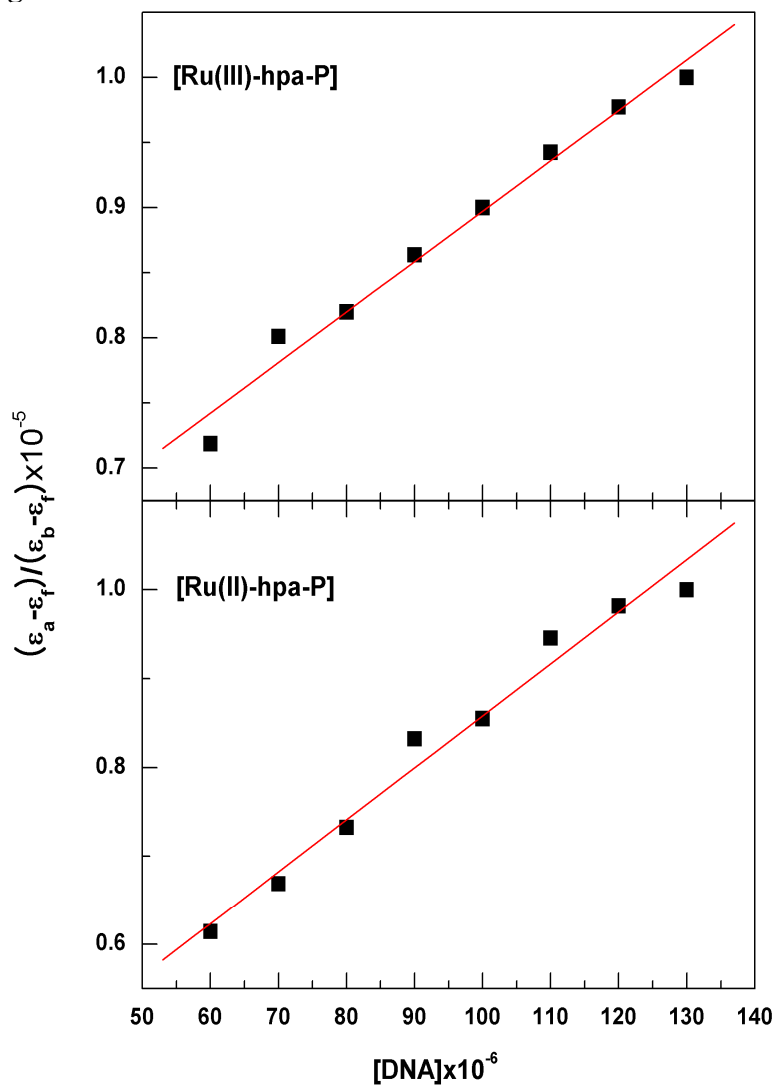

**Fig. S4** Plot of  $(\epsilon_a - \epsilon_f) / (\epsilon_b - \epsilon_f)$  vs  $[\text{DNA}]$  for the titration of DNA with complexes and solid line is linear fitting of the data.

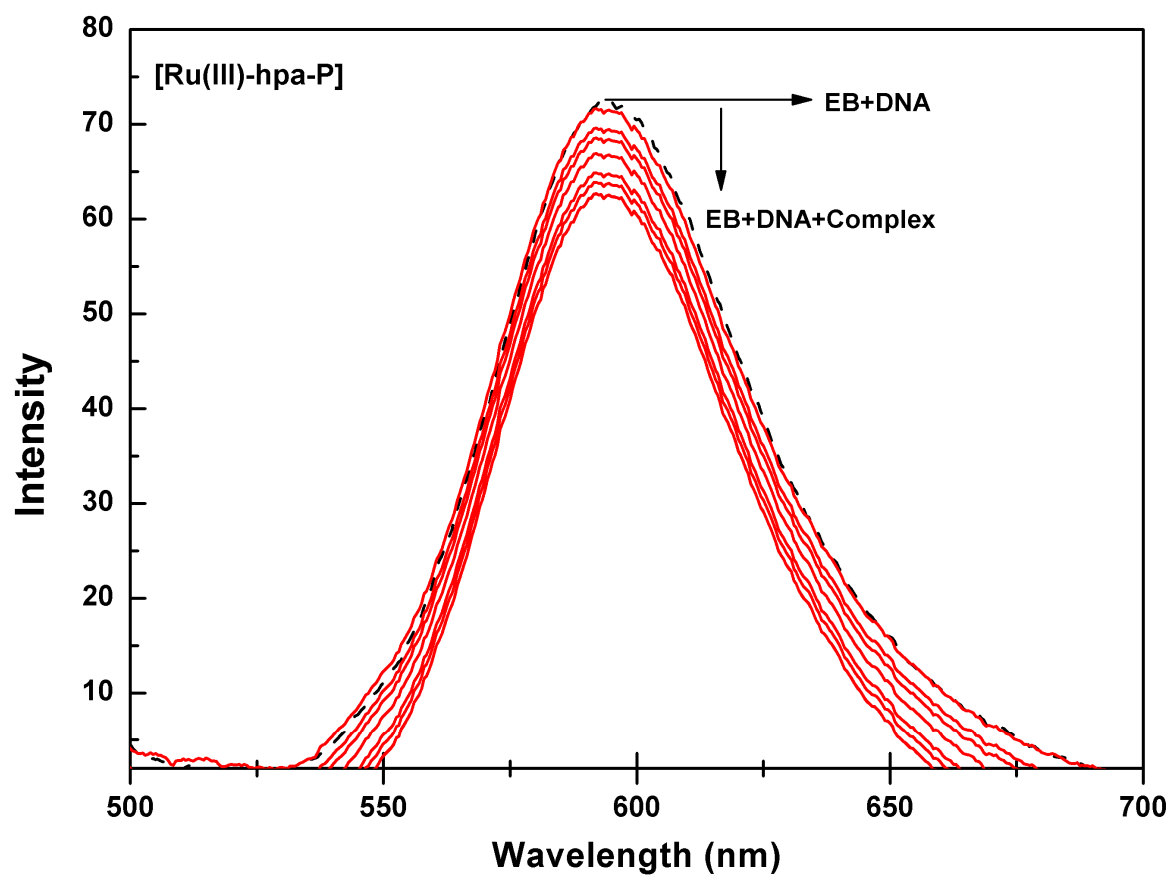

**Fig. S5** Emission spectra of EB bound to DNA in the absence (- - -) and in the presence of [Ru<sup>III</sup>-hpa-P], [EB] = 3  $\mu$ M, [DNA] = 12.5  $\mu$ M, [Complex] = 0.75 -2  $\mu$ M

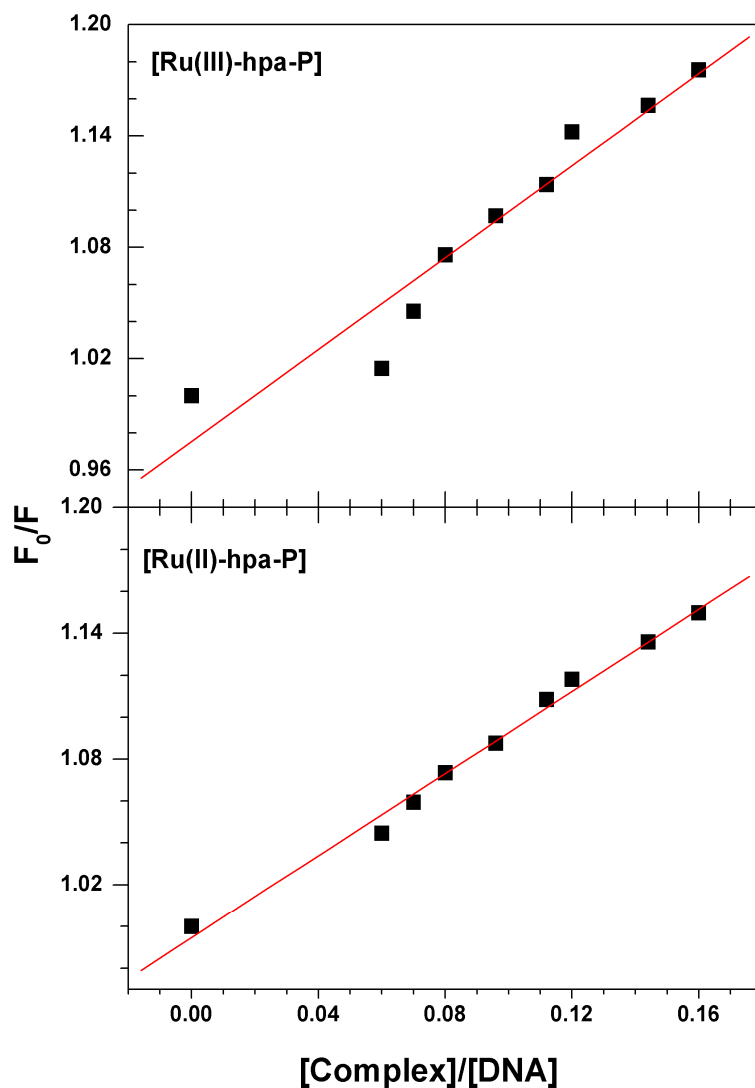

**Fig. S6** Stern–Volmer quenching plot of EB bound to CT-DNA by ruthenium complexes [EB] =  $3\mu\text{M}$ , [DNA] =  $12.5\mu\text{M}$ , [Complex] =  $0.75-2\mu\text{M}$



## 5. Antioxidant activity

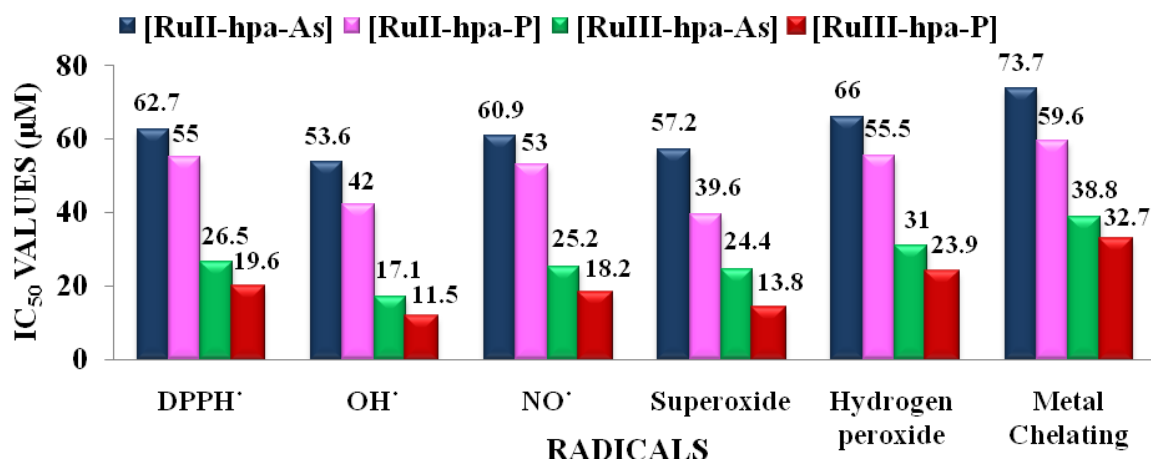

Fig. S7 Antioxidant activity of all the complexes against various radicals

## 6. *in vitro* anticancer studies

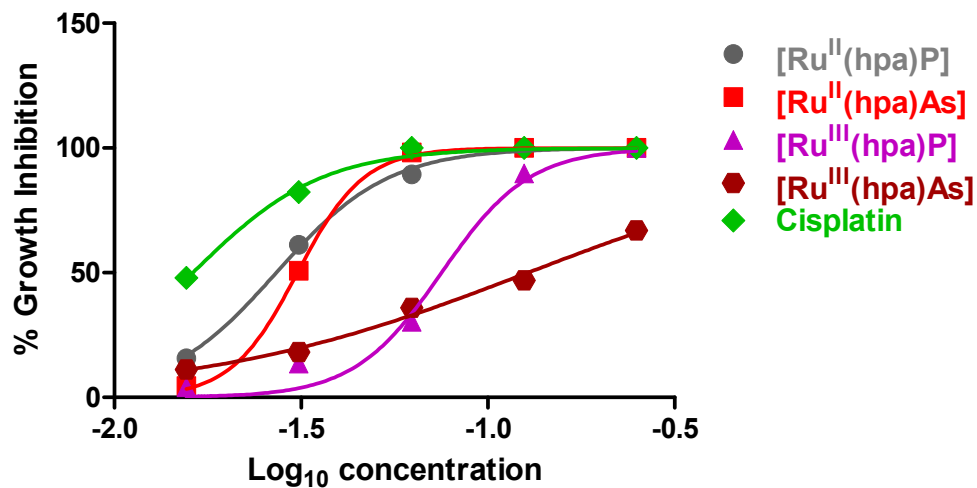

Fig. S8 Concentration effect curve of the complexes against HeLa cell line

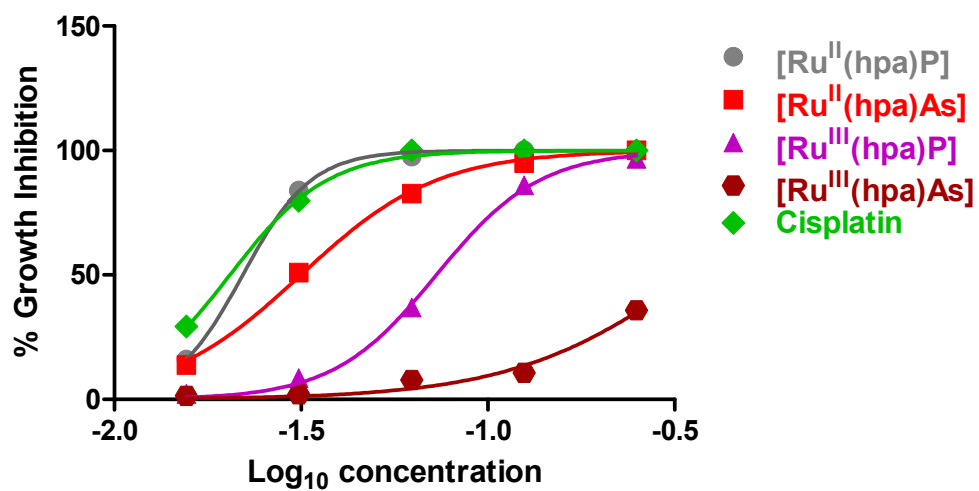

Fig. S9 Concentration effect curve of the complexes against HepG2 cell line

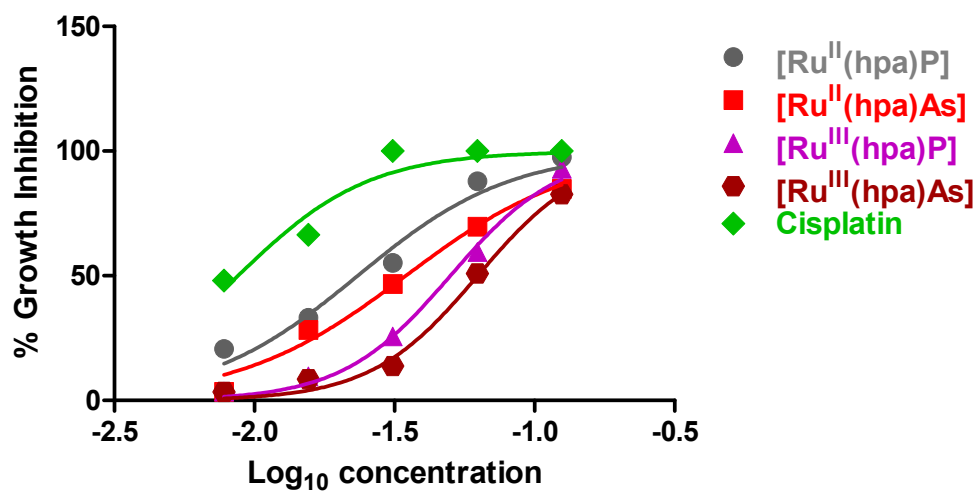

Fig. S10 Concentration effect curve of the complexes against HEP-2 cell line

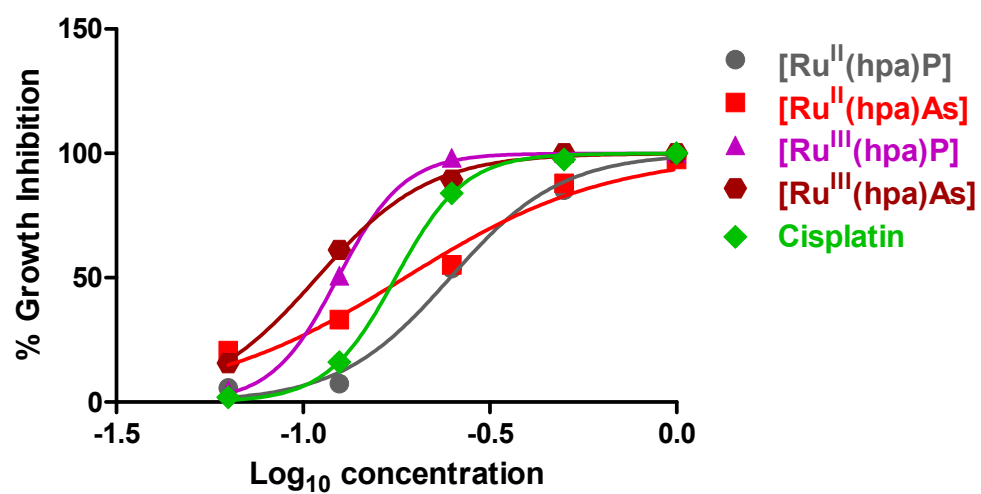

Fig. S11 Concentration effect curve of the complexes against NIH 3T3 cell line
